# Supplementary material
Source: publisher figshare collection journal article supplement (https://frontiersin.figshare.com/ndownloader/files/25442879)
Supplement: Supplementary file 1 [file 25442879]

Supplemental Table 1. Summary of the acoustically tagged individuals and their calculated residence indices.

| Tag Number | Tag Date | Detections | First Detection | Last Detection | Days Detected | Last Day of Study | Rmin | Rmax |
| --- | --- | --- | --- | --- | --- | --- | --- | --- |
| 56251 | 1/12/16 | 1 | 1/20/16 | 1/20/16 | 1 | 3/10/19 | 0.125 | 0.001 |
| 56241 | 1/11/16 | 4 | 3/4/16 | 3/4/16 | 1 | 3/10/19 | 0.019 | 0.001 |
| 56236 | 1/9/16 | 2 | 2/4/16 | 2/4/16 | 1 | 3/10/19 | 0.038 | 0.001 |
| 56234 | 1/11/16 | 20 | 1/20/16 | 1/21/16 | 2 | 3/10/19 | 0.200 | 0.002 |
| 56247 | 1/11/16 | 4 | 1/16/16 | 1/18/16 | 2 | 3/10/19 | 0.286 | 0.002 |
| 56242 | 1/14/16 | 24 | 2/17/16 | 2/25/16 | 3 | 3/10/19 | 0.071 | 0.003 |
| 56240 | 1/9/16 | 8 | 1/17/16 | 2/11/16 | 3 | 3/10/19 | 0.091 | 0.003 |
| 56237 | 1/9/16 | 66 | 1/18/16 | 2/14/16 | 3 | 3/10/19 | 0.083 | 0.003 |
| 56238 | 1/14/16 | 86 | 1/14/16 | 2/11/16 | 13 | 3/10/19 | 0.464 | 0.011 |
| 56245 | 1/14/16 | 34 | 1/21/16 | 3/12/16 | 6 | 3/10/19 | 0.103 | 0.005 |
| 56249 | 1/8/16 | 94 | 2/3/16 | 3/25/16 | 8 | 3/10/19 | 0.104 | 0.007 |
| 56235 | 1/11/16 | 40 | 1/16/16 | 3/16/16 | 9 | 3/10/19 | 0.138 | 0.008 |
| 56254 | 1/14/16 | 38 | 1/21/16 | 4/4/16 | 6 | 3/10/19 | 0.074 | 0.005 |
| 56250 | 1/8/16 | 65 | 1/10/16 | 3/25/16 | 13 | 3/10/19 | 0.169 | 0.011 |
| 56239 | 1/12/16 | 10 | 1/18/16 | 4/16/16 | 2 | 3/10/19 | 0.021 | 0.002 |
| 56244 | 1/8/16 | 98 | 1/10/16 | 4/10/16 | 13 | 3/10/19 | 0.140 | 0.011 |
| 56253 | 1/12/16 | 151 | 1/13/16 | 11/3/16 | 27 | 3/10/19 | 0.091 | 0.023 |
| 56252 | 1/8/16 | 158 | 1/9/16 | 11/12/16 | 21 | 3/10/19 | 0.068 | 0.018 |
| 28371 | 1/26/18 | 14 | 1/26/18 | 1/26/18 | 1 | 3/10/19 | 1.000 | 0.002 |
| 28361 | 1/22/18 | 8 | 1/27/18 | 1/28/18 | 2 | 3/10/19 | 0.333 | 0.005 |
| 28360 | 1/27/18 | 46 | 1/27/18 | 1/29/18 | 2 | 3/10/19 | 1.000 | 0.005 |
| 28374 | 1/29/18 | 17 | 1/30/18 | 2/2/18 | 2 | 3/10/19 | 0.500 | 0.005 |
| 28357 | 1/27/18 | 20 | 1/27/18 | 1/31/18 | 2 | 3/10/19 | 0.500 | 0.005 |
| 28368 | 1/26/18 | 24 | 1/26/18 | 2/5/18 | 2 | 3/10/19 | 0.200 | 0.005 |
| 28367 | 1/26/18 | 15 | 1/26/18 | 2/8/18 | 2 | 3/10/19 | 0.154 | 0.005 |
| 28366 | 1/23/18 | 8 | 1/27/18 | 2/24/18 | 2 | 3/10/19 | 0.063 | 0.005 |
| 28373 | 1/25/18 | 14 | 1/27/18 | 1/29/18 | 3 | 3/10/19 | 0.750 | 0.007 |
| 46698 | 1/27/18 | 17 | 1/27/18 | 2/19/18 | 3 | 3/10/19 | 0.130 | 0.007 |
| 28376 | 1/26/18 | 17 | 1/26/18 | 2/7/18 | 4 | 3/10/19 | 0.333 | 0.010 |
| 28362 | 1/26/18 | 14 | 1/26/18 | 2/7/18 | 4 | 3/10/19 | 0.333 | 0.010 |
| 28365 | 1/27/18 | 108 | 1/27/18 | 3/16/18 | 6 | 3/10/19 | 0.125 | 0.015 |
| 28364 | 1/27/18 | 76 | 1/27/18 | 3/2/18 | 7 | 3/10/19 | 0.206 | 0.017 |
| 28369 | 1/25/18 | 76 | 1/26/18 | 3/3/18 | 9 | 3/10/19 | 0.243 | 0.022 |
| 28363 | 1/26/18 | 170 | 1/26/18 | 5/29/18 | 11 | 3/10/19 | 0.089 | 0.027 |
